# Supplementary material
Source: PubMed Central journal article supplement (PMC6124319)
Supplement: mmc1.pdf [file mmc1.pdf]

**Supplementary Material 1** Some additional information concerning the unsuccessful application for funding to the Medical Research Council (Johnson et al., 1970)

Between 16<sup>th</sup> September and 6<sup>th</sup> October 1970, Edwards corresponded with Mr Dazeley of Douglas January and Partners (Estate Agents), who estimated a total cost of £100,000 for the purchase and adaptation of a building of adequate size for a clinic and laboratory (RGE1, 1970).

On 18<sup>th</sup> March, writing to the MRC on behalf of United Cambridge Hospitals concerning the application from Edwards and Steptoe for funding, the House Governor of Addenbrooke's Hospital offers support conditional on: all funds coming from outside sources, all staff being recruited from outside existing hospital departments, medical services support being budgeted for separately, and any contract offered to Steptoe being as an honorary consultant for "a number of sessions to be agreed". The letter goes on to eliminate the use of Douglas house and a house in Bateman Street for a clinic, both properties included in the grant application, and instead suggest that Steptoe uses out-patient facilities at the New Addenbrooke's site plus the use of an operating theatre for day cases there, but in-patient beds in Newmarket (RGE2, 1971).

Finally, concerning the possible move of Edwards and Steptoe to the MRC Clinical Research Centre (CRC), a letter from Dr Bull, the director, making the offer, is dated 2<sup>nd</sup> December 1970, and a reply from Edwards dated 12<sup>th</sup> December, encloses a copy of the grant submitted to the MRC, and says their plans with Addenbrooke's are very advanced but that they would be delighted to visit the CRC, at a date to be agreed (RGE3, 1970).
