# Supplementary material
Source: PubMed Central journal article supplement (PMC6124319)
Supplement: mmc2.pdf [file mmc2.pdf]

**Supplementary Material 2** Cambridge University Reporter data for yearly expenditure on grants to the Department of Physiology found under the index item 'Research wholly or partly supported by funds from outside bodies' between 1961 and 1974 (excluding those from the Ford Foundation - see **Table 1**).

| <b>Year</b><br><i>(Reporter issue and page no.)</i> | <b>Granting body (grant holder)</b><br><i>? = inferred but not documented</i> | <b>Amount (£) (University Contract no.)</b> | <b>Notes</b><br><i>Indicates purpose and number of staff employed</i> |
|-----------------------------------------------------|-------------------------------------------------------------------------------|---------------------------------------------|-----------------------------------------------------------------------|
| 1961-62<br>(11 <sup>th</sup> May 1964<br>p.1729)    | Journal of Reproduction and Fertility (JRF)<br>(Parkes?)                      | 290<br><br>(27)                             |                                                                       |
|                                                     | Medical Research Council (MRC)<br>(Parkes?)                                   | 5711<br><br>(22)                            | Equipment for Mary Marshall Unit                                      |
|                                                     | Population Council<br>(Parkes?)                                               | 1932<br><br>(23)                            | Comparative physiology and morphology of reproduction                 |
| 1962-63<br>(21 <sup>st</sup> Oct 1964<br>p.341)     | JRF<br>(Parkes?)                                                              | 234<br><br>(27)                             |                                                                       |
|                                                     | MRC<br>(Parkes?)                                                              | 3025<br><br>(22)                            | Equipment for Mary Marshall Unit                                      |
|                                                     | Population Council<br>(Parkes?)                                               | 2687<br><br>(23)                            | Comparative physiology and morphology of reproduction                 |
| 1963-64<br>(21 <sup>st</sup> July 1965<br>p.2225)   | MRC<br>(Parkes?)                                                              | 1263<br><br>(22)                            | Equipment for Mary Marshall Unit                                      |
| 1964-65<br>(3 <sup>rd</sup> Aug 1966,<br>p.2389)    | none                                                                          |                                             |                                                                       |
| 1965-66<br>(16 <sup>th</sup> Aug 1967,<br>p.2127)   | none                                                                          |                                             |                                                                       |
| 1966-67<br>(12 <sup>th</sup> June 1968,<br>p.2212)  | none                                                                          |                                             |                                                                       |
| 1967-68<br>(13 <sup>th</sup> Aug 1969,<br>p.2379)   | MRC<br>(Austin?)                                                              | 625<br><br>(53)                             | Problems of fertilization and embryonic development<br>1 person       |
| 1968-69<br>(12 <sup>th</sup> Aug 1970,<br>p.2474)   | MRC<br>(Austin?)                                                              | 3664<br><br>(53)                            | Problems of fertilization and embryonic development<br>2 persons      |
|                                                     | MRC<br>(?)                                                                    | 2406                                        | Embryology                                                            |

|                                                      |                                            |                    |                                                                                                                          |
|------------------------------------------------------|--------------------------------------------|--------------------|--------------------------------------------------------------------------------------------------------------------------|
|                                                      |                                            | (49)               |                                                                                                                          |
| 1969-70<br>(11th Aug<br>1971,<br>p.1188-9)           | MRC<br>(Austin?)                           | 5852<br><br>(53)   | Problems of fertilization and<br>embryonic development                                                                   |
|                                                      | MRC<br>(?)                                 | 1542<br><br>(49)   | Embryology                                                                                                               |
|                                                      | World Health<br>Organisation<br>(Edwards?) | 1723<br><br>(63)   | Studies on the genetics and<br>embryology of early<br>mammalian and human<br>development                                 |
| 1970-71<br>(6 <sup>th</sup> Dec<br>1972,<br>p.425-6) | MRC<br>(?)                                 | 3163<br><br>(0781) | Embryology                                                                                                               |
|                                                      | MRC<br>(Austin?)                           | 5512<br><br>(0780) | Problems of fertilization and<br>embryonic development<br>2 graduates                                                    |
|                                                      | MRC<br>(Whittingham)                       | 1147<br><br>(1054) | Storage of mouse embryos<br>1.5 assistants                                                                               |
|                                                      | MRC<br>(New?)                              | 1473<br><br>(1043) | Organogenesis and placental<br>development of mammalian<br>embryos grown n vitro                                         |
|                                                      | World Health<br>Organisation<br>(Edwards?) | 4478<br><br>(0787) | Studies on the genetics and<br>embryology of early<br>mammalian and human<br>development<br>2 graduates + 1 assistant CD |
| 1971-72<br>(24 <sup>th</sup> Oct<br>1973,<br>p.31)   | MRC<br>(?)                                 | 1878<br><br>(0781) | Embryology                                                                                                               |
|                                                      | MRC<br>(Whittingham)                       | 2605<br><br>(1054) | Storage of mouse embryos                                                                                                 |
|                                                      | MRC<br>(New?)                              | 2057<br><br>(1043) | Organogenesis and placental<br>development of mammalian<br>embryos grown in vitro                                        |
|                                                      | WHO<br>(Edwards?)                          | 4898<br><br>(0787) | Studies on the genetics and<br>embryology of early<br>mammalian and human<br>development                                 |
|                                                      | Wellcome Trust<br>(Edwards)                | 1070<br><br>(1234) | Immunology of pregnancy<br>and reproduction                                                                              |
| 1972-73<br>7 Aug<br>1974,<br>p.31/32                 | MRC<br>(?)                                 | 484<br><br>(0781)  | Embryology                                                                                                               |
|                                                      | MRC<br>(Whittingham)                       | 7959<br><br>(1054) | Storage of mouse embryos                                                                                                 |
|                                                      | MRC<br>(New?)                              | 4054<br><br>(1043) | Organogenesis and placental<br>development of mammalian<br>embryos grown in vitro                                        |

|                                                   |                                           |                 |                                                                                                |
|---------------------------------------------------|-------------------------------------------|-----------------|------------------------------------------------------------------------------------------------|
|                                                   | World Health Organisation (Edwards?)      | 3919<br>(0787)  | Studies on the genetics and embryology of early mammalian and human development                |
|                                                   | Wellcome Trust (Edwards)                  | 1232<br>(1234)  | Immunology of pregnancy and reproduction                                                       |
|                                                   | Wellcome Trust (Gardner/Edwards)          | 2107<br>(1563)  | Early mammalian development by microsurgical techniques                                        |
|                                                   | Wellcome Trust (Edwards)                  | 684<br>(1509)   | Study of the formation and [maturation] of ovarian follicles in rabbits and mice               |
|                                                   | Smith Kline & French foundation (Johnson) | 2,383<br>(1506) | Molecular biology of preimplantation growth in mice                                            |
| 1973-74<br>(11 <sup>th</sup> Nov 1975,<br>p.32-3) | MRC (Whittingham)                         | 10074<br>(1054) | Storage of mouse embryos                                                                       |
|                                                   | MRC (DAT New?)                            | 4678<br>(1043)  | Organogenesis and placental development of mammalian embryos grown in vitro                    |
|                                                   | MCR (DAT New?)                            | 3412<br>(2008)  | Placental development and parabiosis of rat and mouse embryos in culture                       |
|                                                   | MRC (DAT New?)                            | 956<br>(2022))  | Studies on the mammalian fetus in culture                                                      |
|                                                   | Sybil Eastwood Memorial Trust (Pratt)     | 3245<br>(1506)  | Molecular biology of preimplantation growth in mice                                            |
|                                                   | Wellcome Trust (Edwards)                  | 1273<br>(1234)  | Immunology of pregnancy and reproduction                                                       |
|                                                   | Wellcome Trust (Gardner/Edwards)          | 720<br>(1563)   | Early mammalian development by microsurgical techniques                                        |
|                                                   | Wellcome Trust (Edwards)                  | 1102<br>(1509)  | Study of the formation and [maturation] of ovarian follicles in rabbits and mice               |
|                                                   | World Health Organisation (?)             | 935<br>(2057)   | Assistance with purchase of refrigerated centrifuge ... for studies in reproductive physiology |
| 1974-75<br>(10 <sup>th</sup> Nov 1976,<br>p.34-5) | MRC (Whittingham)                         | 2459<br>(1054)  | Storage of mouse embryos                                                                       |
|                                                   | MCR                                       | 7308            | Placental development and                                                                      |

|  |                                       |                |                                                                                                |
|--|---------------------------------------|----------------|------------------------------------------------------------------------------------------------|
|  | (New?)                                | (2008)         | parabiosis of rat and mouse embryos in culture                                                 |
|  | MRC (New?)                            | 5305<br>(2022) | Studies on the mammalian fetus in culture                                                      |
|  | Smith Kline & French foundation       | 534<br>(2570)  | Follicular formation in the ovary                                                              |
|  | Sybil Eastwood Memorial Trust (Pratt) | 722<br>(1506)  | Molecular biology of preimplantation growth in mice                                            |
|  | Wellcome Trust (Edwards)              | 175<br>(1234)  | Immunology of pregnancy and reproduction                                                       |
|  | Wellcome Trust (Edwards)              | 1307<br>(1509) | Study of the formation and [maturation] of ovarian follicles in rabbits and mice               |
|  | Wellcome Trust (?)                    | 1000<br>(2411) | Immunological relationship between mother and fetus                                            |
|  | World Health Organisation (?)         | 134<br>(2057)  | Assistance with purchase of refrigerated centrifuge ... for studies in reproductive physiology |
