# Supplementary material
Source: PubMed Central journal article supplement (PMC6124319)
Supplement: mmc3.pdf [file mmc3.pdf]

**Supplementary Material 3** Copies of informative acknowledgements from papers by Edwards 1964-1983.

**1964**

**1. Edwards, R.G.** Immunological control of fertility in female mice. *Nature* 203, 50–53.

‘This work was supported by the **Ford Foundation**’

**1965**

**2. Edwards, R.G.** Maturation in vitro of human ovarian oocytes. *Lancet* ii, 926.

‘I thank ... the **Ford Foundation** for generous financial assistance in support of this project.’

**3. Edwards, R.G.** Maturation in vitro of mouse, sheep, cow, pig, rhesus monkey and human ovarian oocytes. *Nature* 208, 349–351.

‘This work was supported by the **Ford Foundation**’

**1966**

**4. Cole, R.J., Edwards, R.G., Paul, J.** Cytodifferentiation and embryogenesis in cell colonies and tissue cultures derived from ova and blastocysts of the rabbit. *Developmental Biology* 13, 385–407.

‘Supported .. in part by grants from the **Ford Foundation** to R.G. Edwards and A.S. Parkes...’

**1967**

**5. Edwards, R.G. and Gardner, R.L.** Sexing of live rabbit blastocysts. *Nature* 214, 576–577

‘We thank ... the **Ford Foundation** ... for financial support.’

**1968**

**6. Gardner, R.L. and Edwards, R.G.** Control of the sex ratio at full term in the rabbit by transferring sexed blastocysts. *Nature* 218, 346–348.

‘This work was supported by ... the **Ford Foundation**.’

**Edwards, R.G., Talbert, L., Israelstam, D., Nino, H.V. and Johnson, M.H.** Diffusion chamber for exposing spermatozoa to human uterine secretions. *American Journal of Obstetrics and Gynecology* 102, 388–396.

‘For financial support, R.G. Edwards wishes to thank the **Ford Foundation** ....’

**Henderson, S.A. and Edwards, R.G.** Chiasma frequency and maternal age in mammals. *Nature* 218, 22–28.

‘One of us (RGE) wishes to thank the **Ford Foundation** for financial support.’

**1969**

**Edwards, R.G., Bavister, B.D., Steptoe, P.C.** 1969. Early stages of fertilization *in vitro* of human oocytes matured *in vitro*. *Nature* 221, 632–635.

‘We thank ... **Drs C Abberley, G Garrett and L Davies** for their help. One of us

(RGE) is indebted to the **Ford Foundation** ... for financial assistance.'

### **1970**

**Edwards, R.G., Steptoe, P.C., Purdy, J.M.** Fertilization and cleavage in vitro of preovulatory human oocytes. *Nature*, 227, 1307–1309.

We thank ... the **Ford Foundation**, the **Manchester Regional Hospital Board**, and the **Oldham and District Hospital Management Committee** for their financial support. We also thank **Searle Scientific Services** for their steroid assay.

**Steptoe, P.C., Edwards, R.G.** Laparoscopic recovery of preovulatory human oocytes after priming of ovaries with gonadotrophins. *Lancet* 295, 683–689.

We thank the **Manchester Regional Hospital Board**, the **Oldham and District Hospital Management Committee**, and the **Ford Foundation** for financial support .... ; and **Searle Scientific Services** for hormone assays.

### **1971**

**Edwards, R.G. and Sharpe, D.J.** Social values and research in human embryology. *Nature* 231, 87–91.

'RGE acknowledges financial support from the **Ford Foundation** and the **American Friends of Cambridge University**.'

**Steptoe, P.C., Edwards, R.G., Purdy, J.M.** Human blastocysts grown in culture. *Nature* 229, 132-133.

'We thank the **Ford Foundation**, the **Oldham and District Hospital Management Committee** and the **Manchester Regional Hospital Board** for their financial support.'

### **1972**

**Edwards, R.G., Steptoe, P.C., Abraham, G.E., Walters, E., Purdy, J.M., Fotherby, K.,** 1972. Steroid assays and preovulatory follicular development in human ovaries primed with gonadotrophins. *Lancet* 300, 611–615.

'We thank the **Ford Foundation**, the **Manchester Regional Hospital Board**, and the **Oldham and District Hospital Management Committee** for financial support;... **Searle Scientific Services** for hormone assays; and ...'

**YoungLai, E.V., Edwards, R.G., Steptoe, P.C.** The enzymatic activity of aspirates of pre-ovulatory human follicles. *Canadian Journal of Biochemistry* 50, 233-236.

"This research was supported in part by ... the **Ford Foundation**, the **Oldham and District Hospital Management Committee** and the **Manchester Regional Hospital Board**.

### **1973**

**Edwards, R.G.** Physiological aspects of human ovulation, fertilization and cleavage. *J. Reprod. Fertil.* (Supplement), 18, 87–101.

'I would like to thank ... the **Ford Foundation** for financial help.'

**Edwards, R.G.** Studies on human conception. *American Journal of Obstetrics and Gynecology* 117, 587–601.

‘I wish to acknowledge the considerable assistance and help I have received from the **Ford Foundation** in the development of this work since its inception, and I would also like to thank .. **Miss Lillian Howell** ... for (her) considerable assistance and encouragement.’

**Fowler, R.E, and Edwards, R.G.** The genetics of early human development. *Progress in Medical Genetics* IX, 49–112.

‘We wish to thank .... the **Ford Foundation** for continued financial support.’

### **1974**

**Edwards, R.G.** Fertilization of Human Eggs in Vitro: Morals, Ethics and the Law. *Quarterly Reviews in Biology*. 49, 3–26.s.

‘I am grateful to many of my colleagues for their contributions towards the writing of this manuscript, including ..., **Lillian Howell**, ... and the **Ford Foundation**.’

**Edwards, R.G. and Steptoe, P.C.** Control of human ovulation, fertilization and implantation. *Proceedings of the Royal Society of Medicine* 67, 932–936. (Section: *Obstetrics and Gynaecology*), pp. 30–34).

‘We are grateful to the **Ford Foundation**, the **Manchester Regional Hospital Board**, the **Oldham and District Hospital Management Committee** and to many individuals including .... **Miss L Howells** .... for help and encouragement.’

### **1975**

**Edwards, R.G., Steptoe, P.C.** Induction of follicular growth, ovulation and luteinization in the human ovary. *J. Reprod. Fertil.* (Supplement), 22, 121–163.

‘We thank ... **Dr. D. Orrell, Searle Scientific Services**, for most of the assays, and the **Ford Foundation**, the **Oldham and District Hospital Management Committee** and the **Manchester Regional Hospital Board** for financial help.’

### **1976**

**Steptoe, P.C., Edwards, R.G.** Reimplantation of a human embryo with subsequent tubal pregnancy. *Lancet* 307, 880–882.

‘We thank the **North Western Regional Health Authority and the Oldham Area Health Authority**, **Miss L. Howells**, ... for their encouragement in this work.’

**Faddy, M.J., Jones, E.C., Edwards, R.G.** An analytical model for ovarian follicle dynamics. *Journal of Experimental Zoology* 1976, 173–185.

‘One of us (RGE) thanks the **Ford Foundation** ..... for financial help.’

### **1977**

**Edwards, R.G., Fowler, R.E., Gore-Langton, R.E., Gosden, R.G., Jones, E.C., Readhead, C., Steptoe, P.C.** Normal and abnormal follicular growth in mouse, rat and human ovaries. *J. Reprod. Fertil.*, 51, 237–263.

‘We thank the **Ford Foundation**, **Miss Lillian Howells**, and the **Manchester Area Health Authority** for their kindness in supporting these studies, and Dr G.E. Abraham for kindly providing all the antibodies used in the radio-immuno-assays.’

## **1978**

**Fowler, R.E., Edwards, R.G., Walters, D.E., Chan, S.T.H., Steptoe, P.C.**

Steroidogenesis in preovulatory follicles of patients given human menopausal and chorionic gonadotrophins as judged by the radioimmunoassay of steroids in follicular fluid. *J. Endocrinol.*, 77, 161–169.

‘We also wish to thank ... **Miss L Howells** and the **Oldham and District Hospital Management Committee and the Manchester Regional Hospital Board** for their help and encouragement, and **Dr D. Orell and Searle Scientific Services** for analyzing the urinary hormones.’

**Fowler, R.E., Fox, N.L., Edwards, R.G., Walters, D.E., Steptoe, P.C.** Steroidogenesis by cultured granulosa cells aspirated from human follicles using pregnenolone and androgens as precursors. *J. Endocrinol.*, 77, 171–183.

‘We also wish to thank **Miss L. Howells** and the **Oldham and District Hospital Management Committee and the Manchester Regional Hospital Board** for their help and encouragement, and **Searle Scientific Services** for analyzing the urinary hormones.’

**Fowler, R.E., Fox, N.L., Edwards, R.G., Steptoe, P.C.** Steroid production from 17\*-hydroxypregnenolone and dehydroepiandrosterone by human granulosa cells in vitro. *J. Reprod. Fertil.*, 54, 109–117.

‘We thank the **Ford Foundation** and the Thomas J. Watson Foundation (N.L.F.) for financial support; and **Miss L. Howells** and the **Oldham and District Hospital Management Committee and the Manchester Regional Hospital Board** for their help and encouragement.’

## **1980**

**Edwards, R G, Steptoe, P C, Fowler, R E and Baillie, J. 1980.** Observations on preovulatory human ovarian follicles and their aspirates. *Br. J. Obstet. Gynaecol.*, 87, 769–779.

‘We thank **Miss L. Howells** .... for their support, **Mr Kellett and G. D. Searle and Company** for hormone assays, .... the **staff of Kershaw’s Hospital and the Oldham General Hospital and the North West Regional Health Authority and the Oldham Area Authority** for their full co-operation.’

**Edwards, RG, Steptoe, PC and Purdy, JM. 1980.** Establishing full term human pregnancies using cleaving embryos grown in vitro. *British Journal of Obstetrics and Gynaecology* 87, 737–756.

‘We thank **Miss L. Howells**, the **Manchester Regional Hospital Board and the**

Oldham and District General Hospital for financial support, Miss M. Harris and the nursing staff and Mr Holmes and the staff of Kershaw's Hospital for their unstinting cooperation, Mr Kellet and G. D. Searle for hormone assays, ... for their support.'

**Step toe, PC, Edwards, RG and Purdy, JM.** Clinical aspects of pregnancies established with embryos grown in vitro. British Journal of Obstetrics and Gynaecology 87, 757–768.

'We thank the North West Regional Health Authority, the Oldham Area Health Authority and Miss L. Howells for financial support. We are very grateful for the unstinting co-operation of Miss M. Harris and the nursing staff of the Oldham and District General Hospital, and that of Mr Holmes and the staff of Kershaw's Hospital. We also thank Mr Kellet and G. D. Searle and Company for the hormone assays, ...'

### **1983**

**Edwards, R.G. and Steptoe, P.C.** Current status of in-vitro fertilization and implantation of human embryos. Lancet 322, 1265–1270.

'We thank .. the Ford Foundation for their support.'
