# Supplementary material
Source: PubMed Central journal article supplement (PMC6124319)
Supplement: mmc4.pdf [file mmc4.pdf]

**Supplementary Material 4** Summary of 'notes' written on travel claims.

| <i>Date</i>                   | <i>Claim</i>                                                                                                                                                         | <i>Amount</i>                                                     |
|-------------------------------|----------------------------------------------------------------------------------------------------------------------------------------------------------------------|-------------------------------------------------------------------|
| 4/1/70                        | RGE petrol                                                                                                                                                           | £2.90                                                             |
| 12/3/71                       | Owe C.K.                                                                                                                                                             | £3.10 paid £4                                                     |
| 12/6/72                       |                                                                                                                                                                      |                                                                   |
| 21/7/73                       | RGE petrol no receipt<br>JMP petrol no receipt                                                                                                                       | £2<br>£2                                                          |
| January 74                    | RGE +JMP claimed travel                                                                                                                                              |                                                                   |
| 20/1/74                       | RGE no receipt                                                                                                                                                       | £4.35                                                             |
| 26/3/74                       | Travel claims JP/RE/JS/IF                                                                                                                                            |                                                                   |
| From 14/6/74(3?) to<br>8/5/74 | Paid by Mr Holmes                                                                                                                                                    |                                                                   |
| 3/6/74                        | Travel claims JP/RE/JS/IF                                                                                                                                            |                                                                   |
| 8/7/75                        | Mr Holmes?                                                                                                                                                           |                                                                   |
| 27/6/75                       | Accom<br>Suppers<br>Tea<br>Lunch<br>Coffee<br>3x single train<br>Bus<br>??                                                                                           | £15.10<br>40p<br>£1.14<br>£9.60<br>£1.16<br>£5.58<br>25p<br>£6.00 |
| 22/12/75                      | Expenses claimed. Mr<br>Holmes still to pay                                                                                                                          |                                                                   |
| 9/7/76                        | Claim for travel. Mr Homes<br>paid                                                                                                                                   | £4/day/each                                                       |
| 8/12/75-21/9/76               | 111 days at £2/day<br>£2 from Kershaws<br>£4/day each                                                                                                                | £222.00                                                           |
| 3/12/76                       | All expenses claimed & Mr<br>H paid up to 15/7/77.<br>All expenses claimed up to<br>13/11/77 & Mr H still to<br>pay for 10/10/77-13/10/7<br>x2 & 8/11/77-13/11/77 x2 |                                                                   |
| 20/12/77                      | Claimed                                                                                                                                                              |                                                                   |
